# Supplementary material
Source: PubMed Central journal article supplement (PMC4122293)

**Supplemental Table 1**

| Rat Genes           | Genebank  | Primer Sequences                                                                     |
|---------------------|-----------|--------------------------------------------------------------------------------------|
| preproendothelin-1  | M64711    | Sense 5' ACTTCTGCCACCTGGACATC 3'<br>Anti-sense: 5' GCTCGGAGTTCTTTGTCTGC 3'           |
| GAPDH               | BC087743  | Sense: 5' TGCACCACCAACTGCTAAGC 3'<br>Anti-sense: 5' GGCATGGACTGTGGTCATGAG 3'         |
| ECE-1               | NM_053596 | Sense, 5' GGACTTCTTCAGCTACGCCTGT 3'<br>Anti-sense, 5' CTAGTTTCG TTCATACACGCACG 3'    |
| integrin $\alpha$ 5 | XM235707  | Sense, 5' GGCAGCTATGGCGTCCC ACTGTGG 3'<br>Anti-sense, 5' GGCATCAGAGGTGGCTGGAGGCTT 3' |
| integrin $\beta$ 1  | NM_017022 | Sense, 5' GTGGTTGCTGGAATTGTTCTTATT 3'<br>Anti-sense, 5' TTTCCCTCATACTTCGGATTGAC 3'   |

# Supplemental Figure 1

**A**

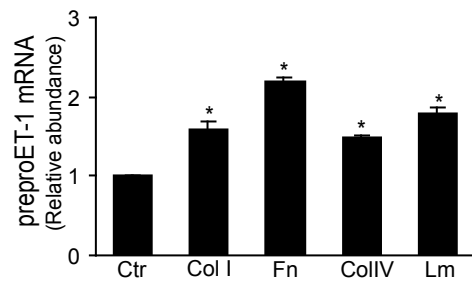

**B**

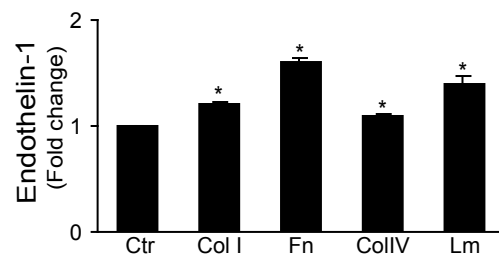

## Supplemental Figure 2

**A**

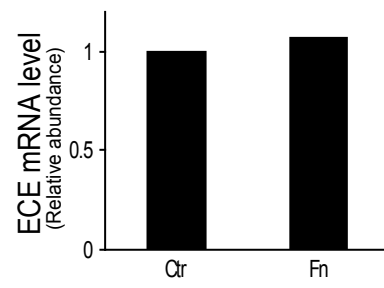

**B**

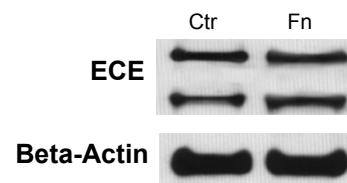

**C**

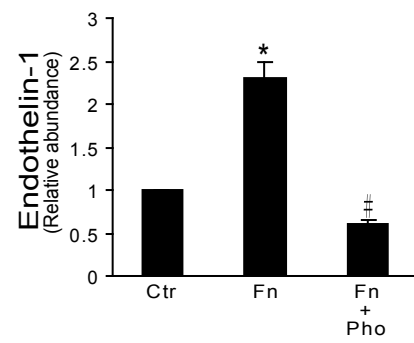

## Supplemental Figure 3

**A**

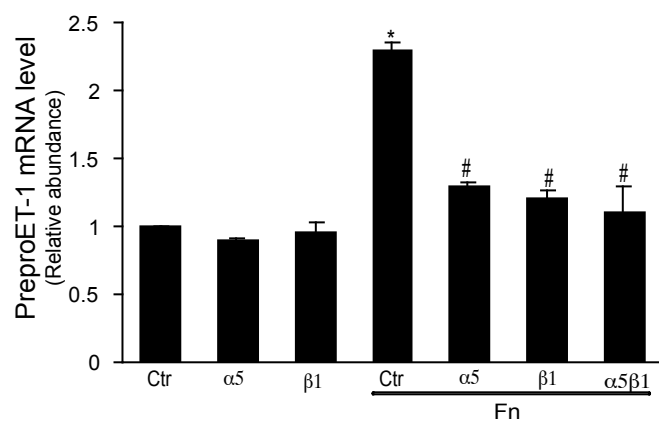

**B**

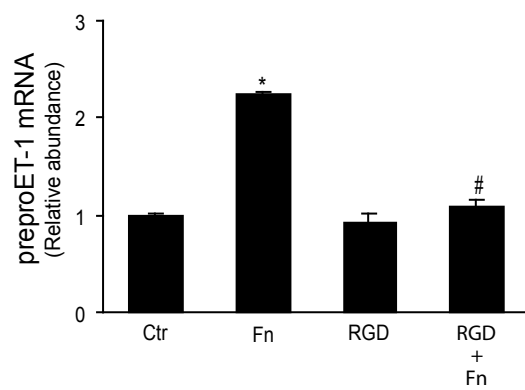

## Supplemental Figure 4

**A**

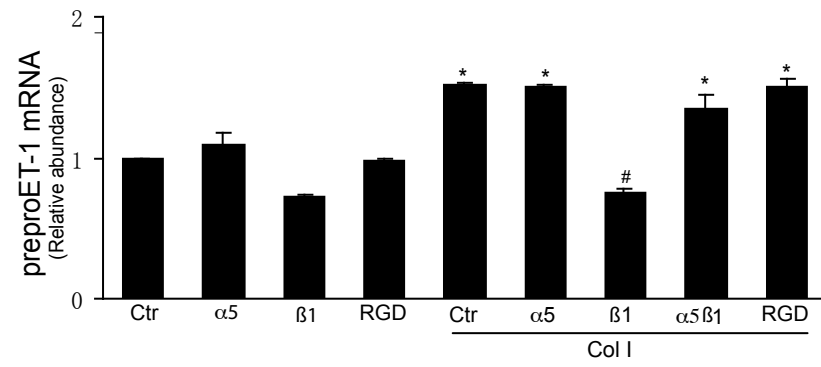

**B**

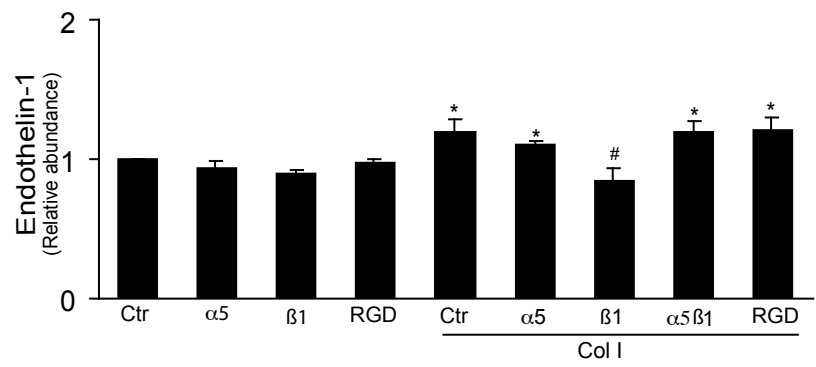

**Supplemental Figure 5**

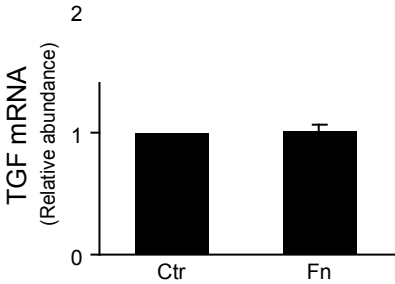

## Supplemental Figure 6

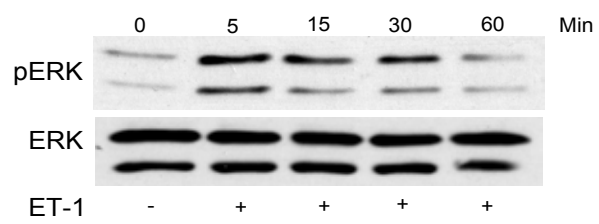

## Supplemental Figure 7

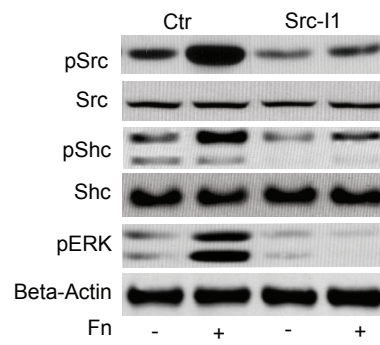



## Supplemental Figure 8

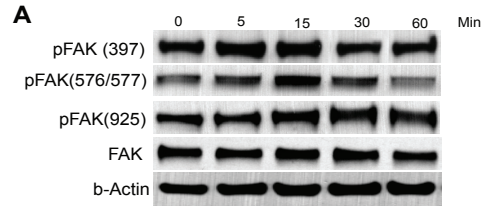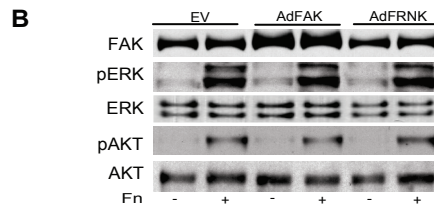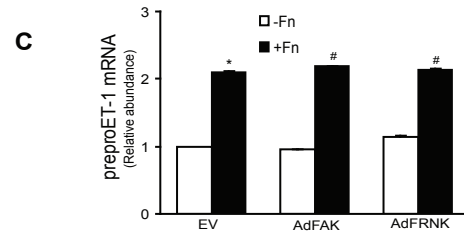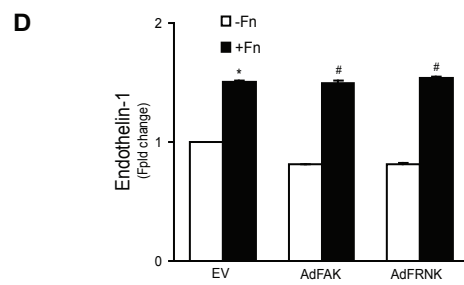

## Supplemental Figure 9

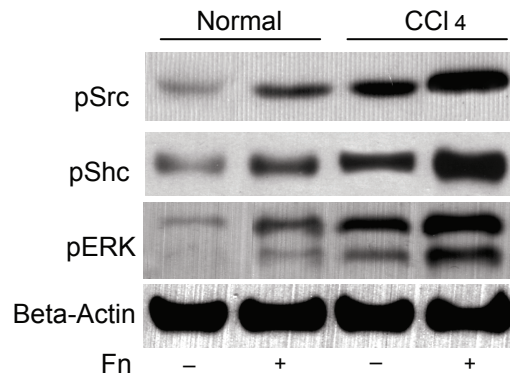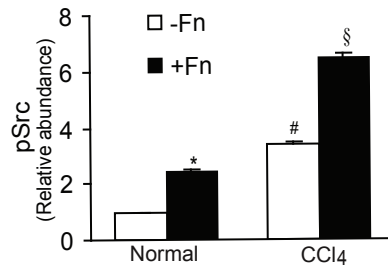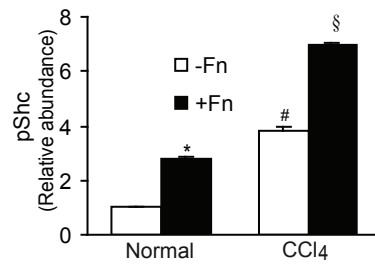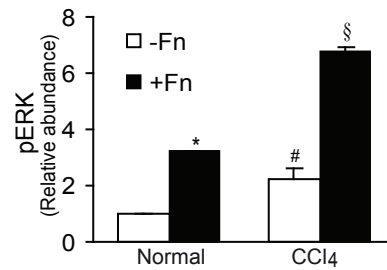

Supplement: NIHMS93683-supplement-Figures.pdf [file NIHMS93683-supplement-Figures.pdf]
